# Supplementary material
Source: PubMed Central journal article supplement (PMC3976578)
Supplement: Supp_Figure1.pdf [file Supp_Figure1.pdf]

## Supplementary Data

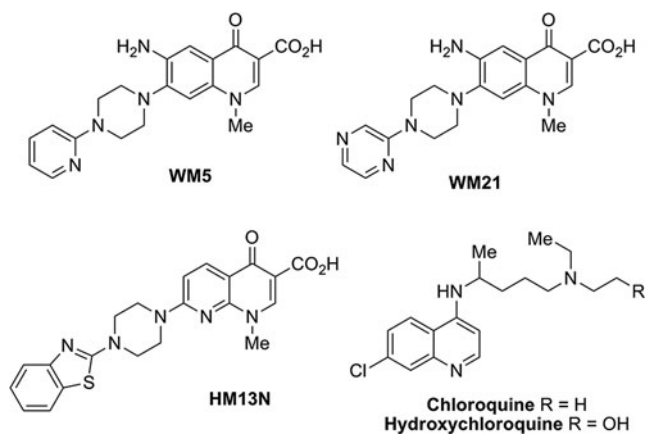

**SUPPLEMENTARY FIG. S1.** Structure of the three studied 6-desfluoroquinolone compounds (6-DFQs), chloroquine (CQ), and hydroxychloroquine (HCQ). The structures of the three 6-DFQs tested in this study, WM5, WM21, and HM13N, are shown in comparison with CQ/HCQ.
