# Supplementary material
Source: PubMed Central journal article supplement (PMC3976578)
Supplement: Supp_Figure2.pdf [file Supp_Figure2.pdf]

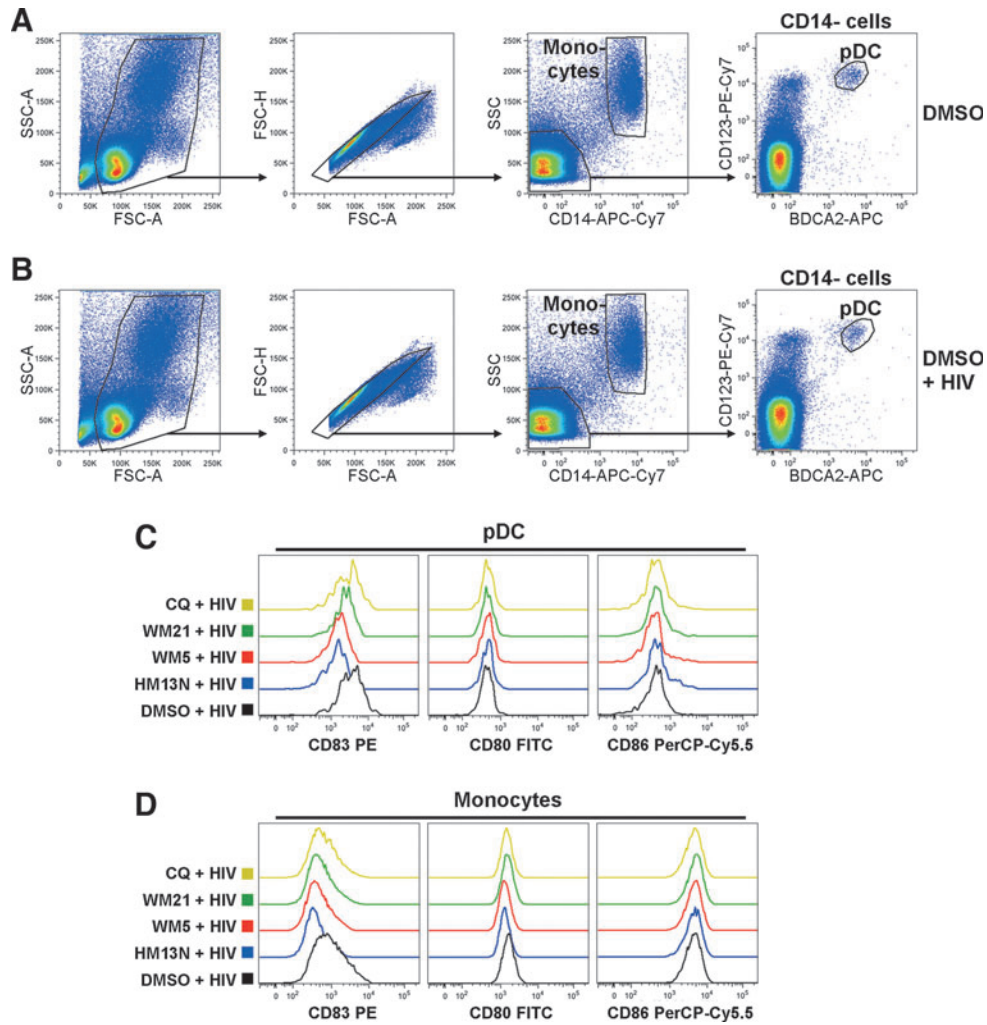

**SUPPLEMENTARY FIG. S2.** Flow cytometry gating strategy and example plots for plasmacytoid dendritic cells (pDCs) and monocyte activation markers. **(A, B)** Flow cytometry dot-plots showing one example of the gating strategy used to identify pDCs and monocytes in peripheral blood mononuclear cells (PBMCs) cultured with dimethyl sulfoxide (DMSO) alone **(A)** or DMSO + HIV **(B)** for experiments shown in Figs. 3 and 4. Briefly, within the live gate monocytes were identified as CD14<sup>+</sup> cells; pDCs were identified as CD123<sup>+</sup>BDCA2<sup>+</sup> cells within the CD14<sup>+</sup> population. **(C, D)** Flow cytometry histograms showing CD83, CD80, and CD86 expression in pDCs **(C)** and monocytes **(D)** in PBMCs cultured with HIV in the presence or absence of 6-DFQs, CQ, or DMSO. One example out of  $N=6$  independent experiments is shown for all panels.
