# Supplementary material
Source: PubMed Central journal article supplement (PMC3976578)
Supplement: Supp_Figure3.pdf [file Supp_Figure3.pdf]

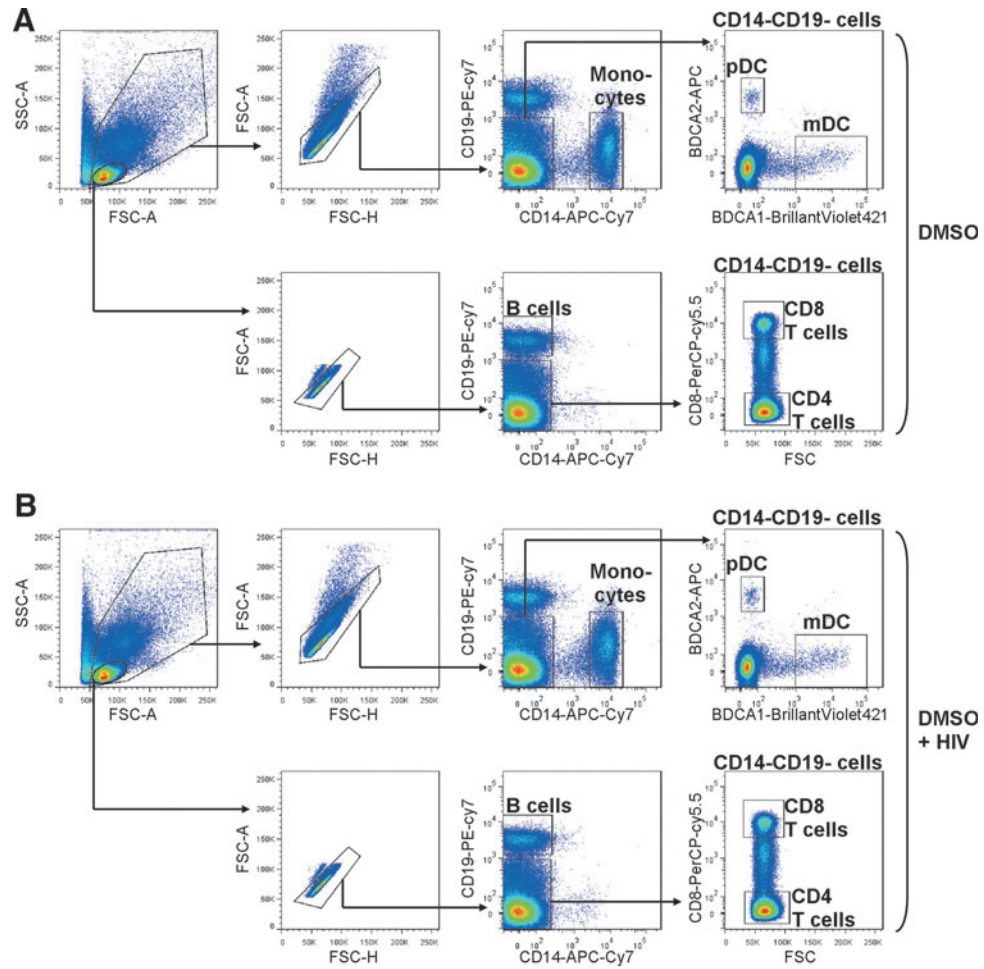

**SUPPLEMENTARY FIG. S3.** Flow cytometry gating strategy for HIV uptake assay. Flow cytometry dot-plots showing one example of the gating strategy used to identify pDCs, myeloid dendritic cells (mDCs), monocytes, B cells, CD4, and CD8 T cells in PBMCs from one representative healthy donor cultured overnight with DMSO alone (**A**) or DMSO+HIV (**B**) for experiments shown in Fig. 4 and Supplementary Figs. S4 and S5.
