# Supplementary material
Source: PubMed Central journal article supplement (PMC3976578)
Supplement: Supp_Figure5.pdf [file Supp_Figure5.pdf]

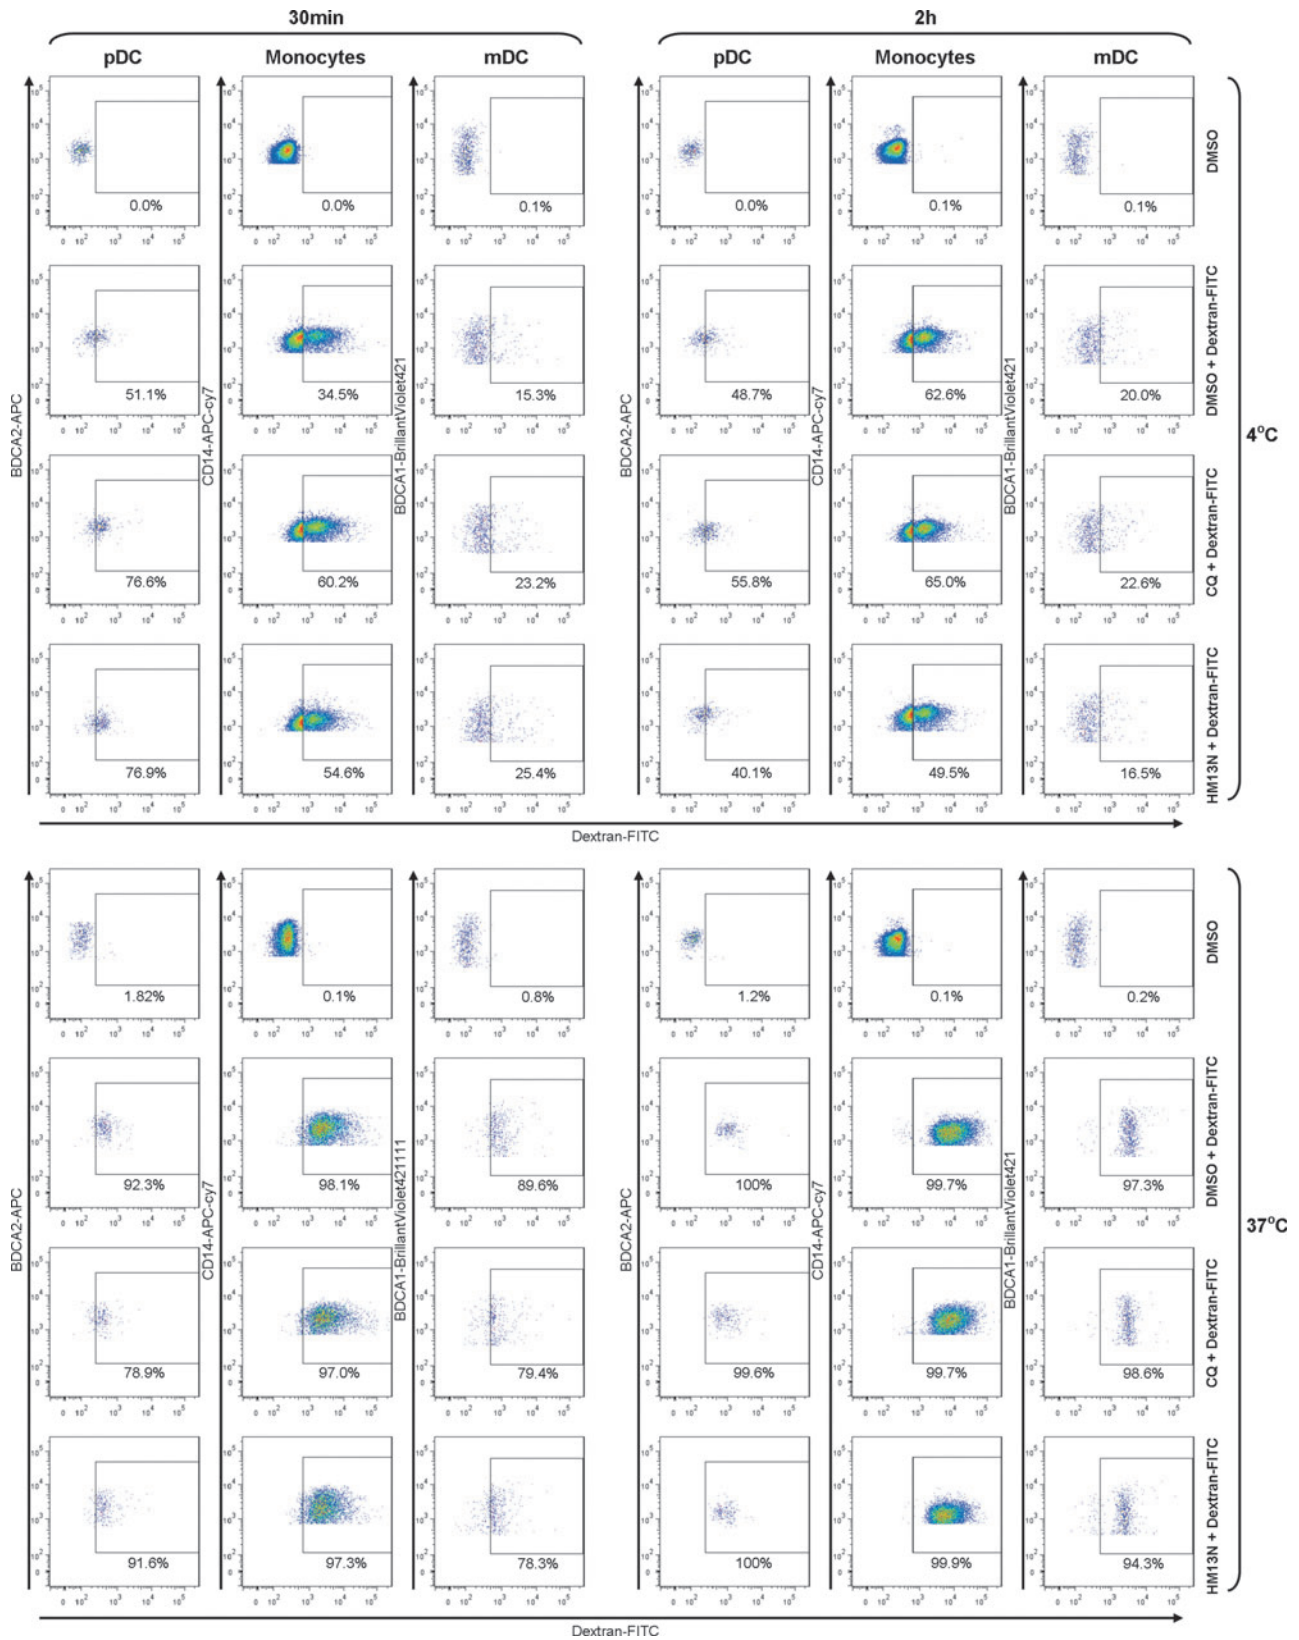

**SUPPLEMENTARY FIG. S5.** Flow cytometry plots for one example of dextran-FITC uptake after 30 min and 2 h incubation at 37°C and 4°C. Flow cytometry dot-plots for pDCs, monocytes, and mDCs (gated as shown in Supplementary Fig. S3A) in PBMCs from one representative healthy donor cultured overnight with 0.1% DMSO, DMSO+dextran-FITC, HM13N+dextran-FITC, or CQ+dextran-FITC for 30 min at 4°C (top left panels), 30 min at 37°C (bottom left panels), 30 min at 37°C (top right panels), and 2 h at 37°C (bottom right panels).
